# Supplementary material for: Use of the Thyromental Height Test for Prediction of Difficult Laryngoscopy: A Systematic Review and Meta-Analysis
Source: MDPI journal article supplement (doi:10.3390/jcm11164906), 2022-08-21
Supplement: s1 [file s1]

**Supplement Table S2: Stata code used for meta-analysis**

| <b>Meta analysis</b>                   | <b>Stata code</b>                                                                                                                                                                                            |
|----------------------------------------|--------------------------------------------------------------------------------------------------------------------------------------------------------------------------------------------------------------|
| Threshold effect and summary estimates | midas tp fp fn tn, res(all)                                                                                                                                                                                  |
| Forest plots and heterogeneity         | midas tp fp fn tn, texts(0.7) bfor(dss) id(author year) ford fors<br>midas tp fp fn tn, texts(0.7) bfor(dlr) id(author year) ford fors<br>midas tp fp fn tn, texts(0.7) ufor(dlor) id(author year) ford fors |
| Sensitivity analysis                   | metaninf tp fp fn tn, lable(namevar=author,year=year)                                                                                                                                                        |
| Publication bias                       | midas tp fp fn tn, pubbias                                                                                                                                                                                   |
| SROC curve                             | midas tp fp fn tn, plot sroc(both)                                                                                                                                                                           |
