# Supplementary material for: Use of the Thyromental Height Test for Prediction of Difficult Laryngoscopy: A Systematic Review and Meta-Analysis
Source: MDPI journal article supplement (doi:10.3390/jcm11164906), 2022-08-21
Supplement: s1 [file s1]

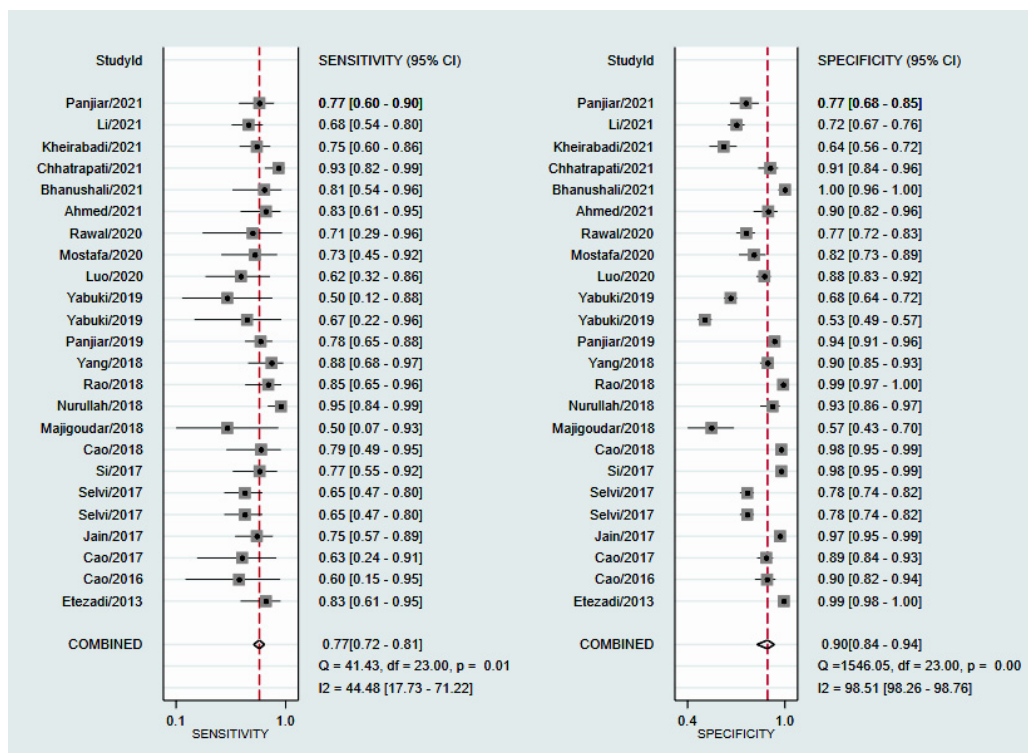

**Supplement Figure S1** Forest plots of the analysis about the prediction value of TMHT for DL in terms of sensitivity and specificity after removing heterogeneous studies.

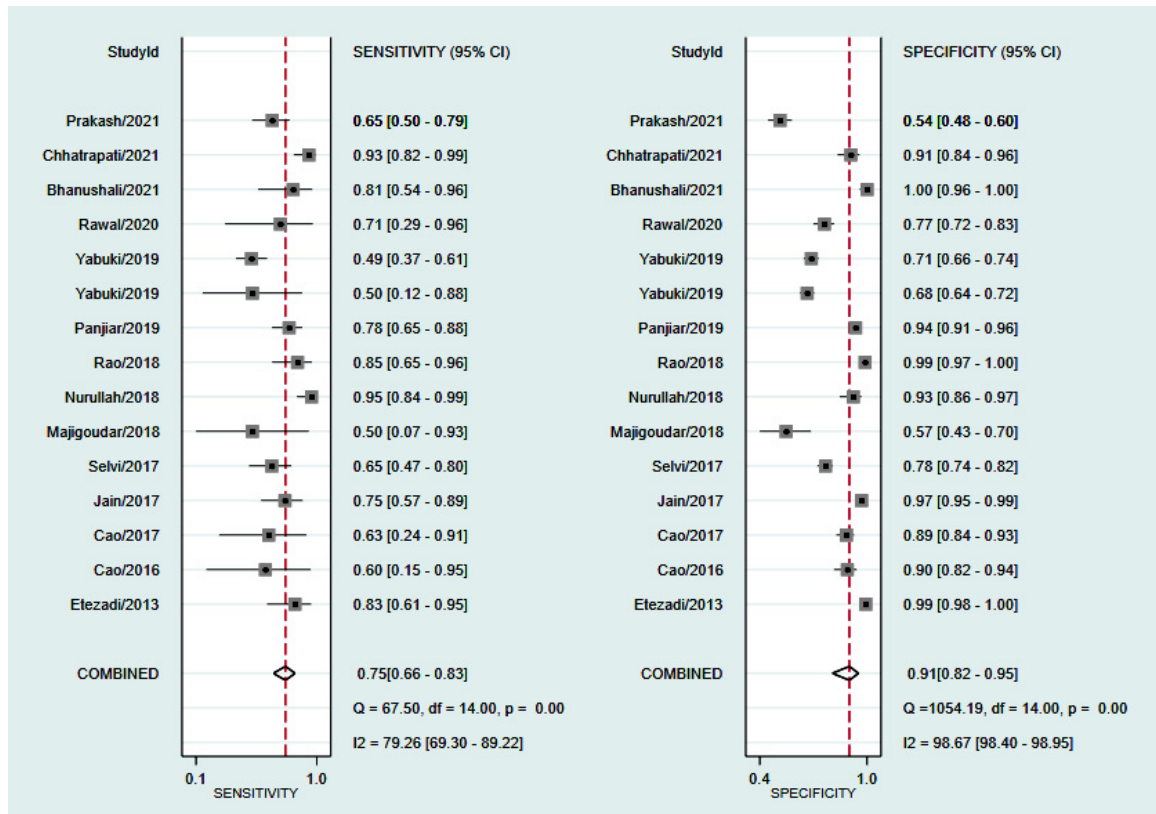

**Supplement Figure S2** Forest plots of the analysis about the prediction value of TMHT for DL in terms of sensitivity and specificity with the data of only studies consisting of a 5 cm threshold.

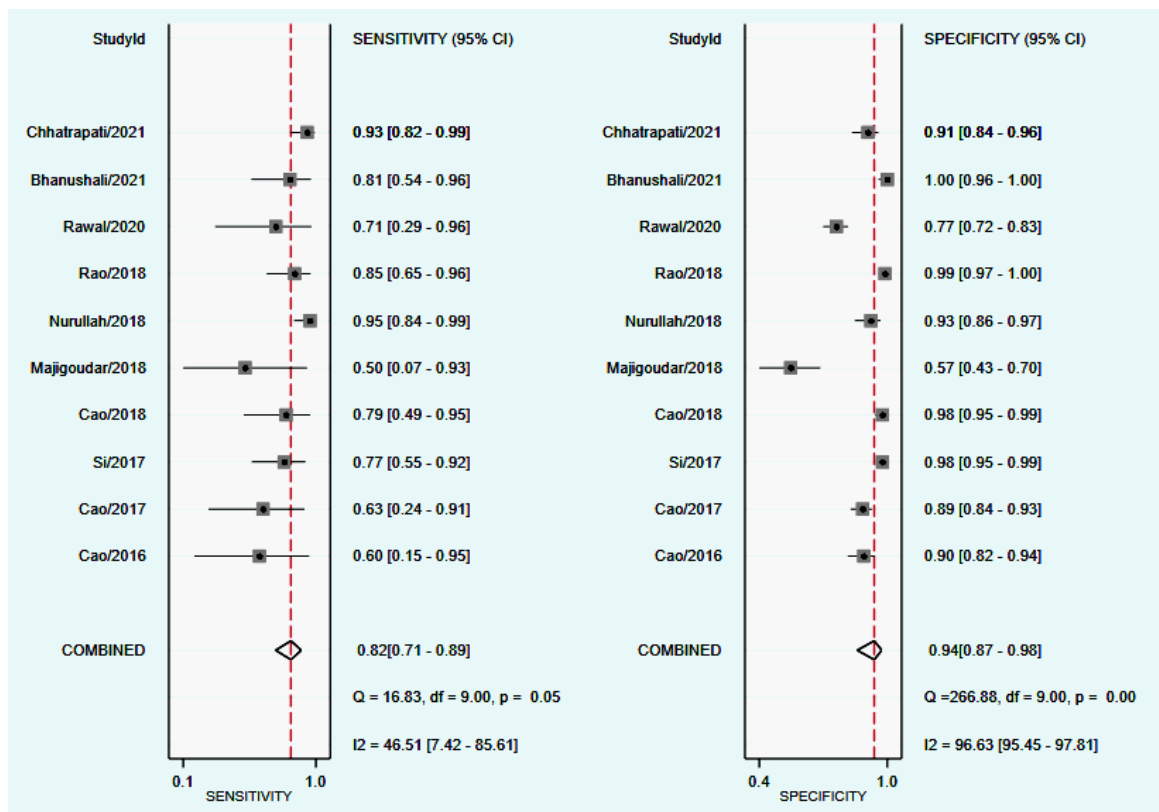

**Supplement Figure S3** Forest plots of the analysis about the prediction value of TMHT for DL in terms of sensitivity and specificity with the data of only studies consisting of a prespecified threshold

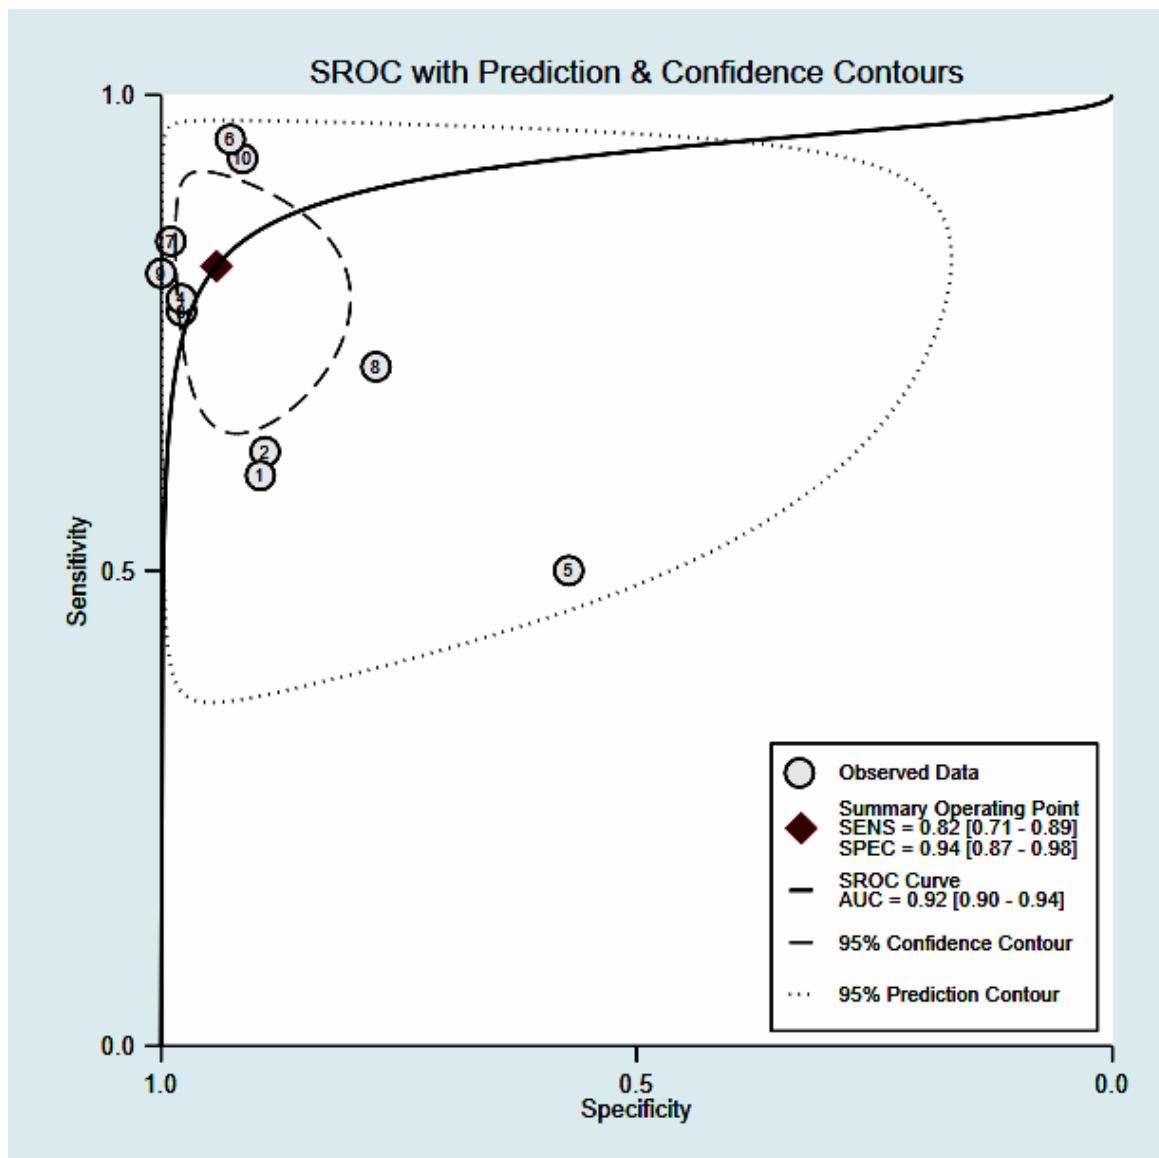

**Supplement Figure S4** SROC for sensitivity and specificity of TMHT for prediction of DL with the data of studies consisting of a prespecified threshold.

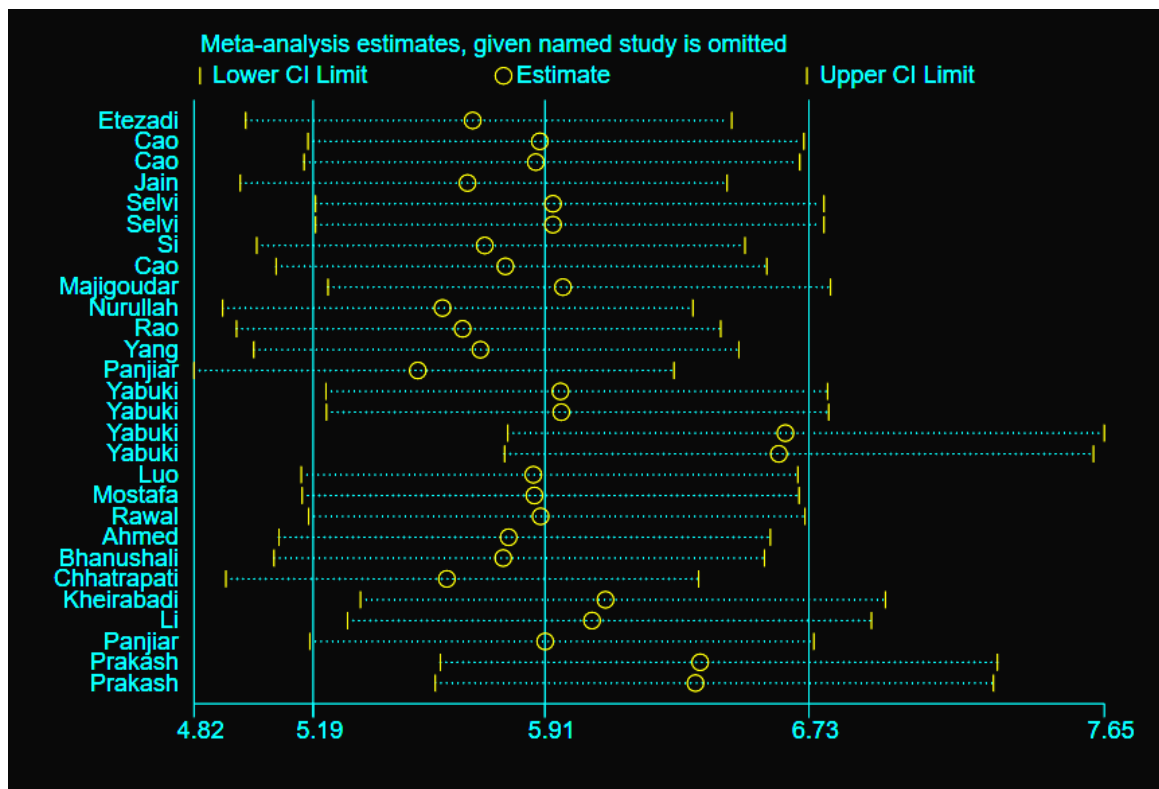

**Supplement Figure S5** Forest plot of sensitivity analysis of all studies selected from literature review.

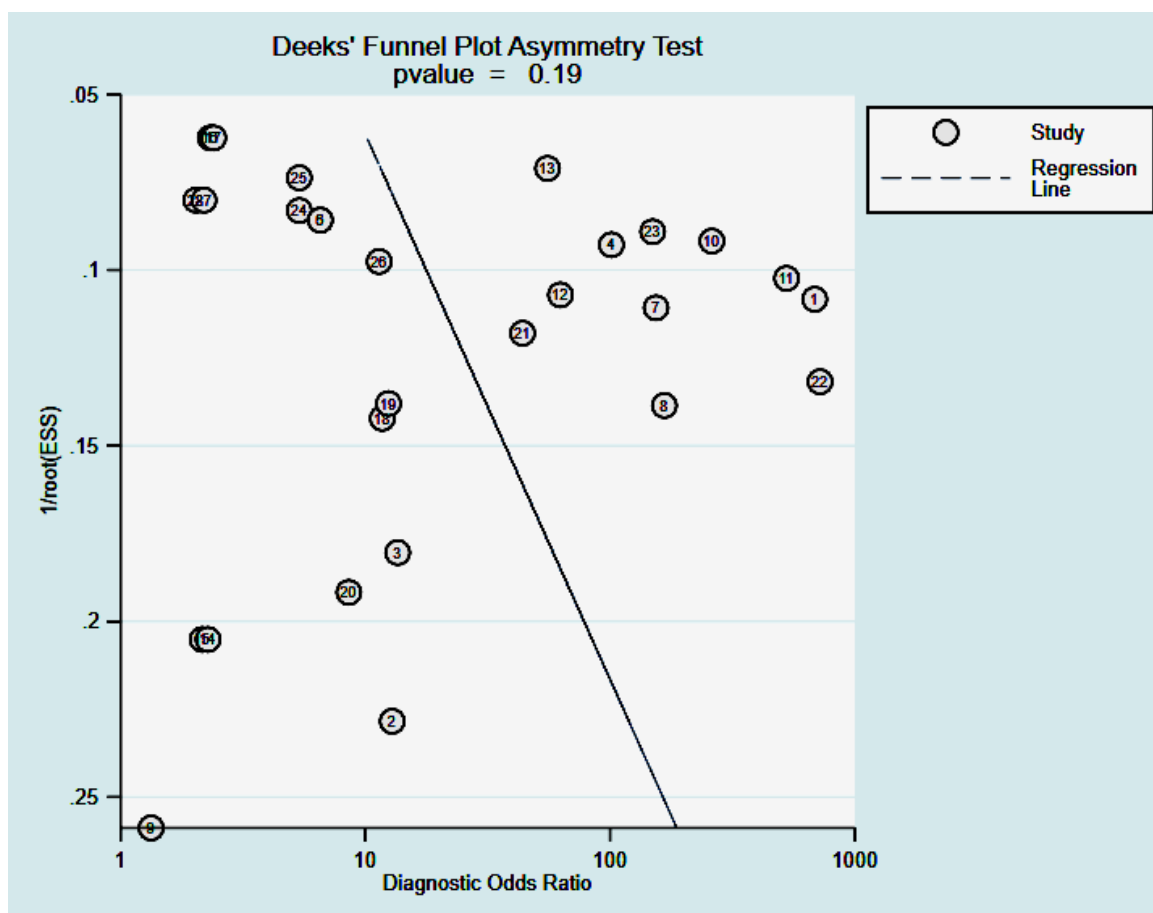

**Supplement Figure S6** Deek's funnel plot asymmetry test for publication bias of all studies selected from literature review.
