# Supplementary material for: Use of the Thyromental Height Test for Prediction of Difficult Laryngoscopy: A Systematic Review and Meta-Analysis
Source: MDPI journal article supplement (doi:10.3390/jcm11164906), 2022-08-21
Supplement: s1 [file s1]

**Supplement Table S1: PubMed search strategy**

| Search number | Query                                                                                                                                                                                                                                                                                                                                                                                                                                                                                                                                                                         | Results |
|---------------|-------------------------------------------------------------------------------------------------------------------------------------------------------------------------------------------------------------------------------------------------------------------------------------------------------------------------------------------------------------------------------------------------------------------------------------------------------------------------------------------------------------------------------------------------------------------------------|---------|
| 1             | laryngoscopy[MeSH]                                                                                                                                                                                                                                                                                                                                                                                                                                                                                                                                                            | 13,589  |
| 2             | ((((((((Laryngoscopies[Title/Abstract]) OR (Laryngoscopic Surgical Procedures[Title/Abstract])) OR (Laryngoscopic Surgical Procedure[Title/Abstract])) OR (Procedure, Laryngoscopic Surgical[Title/Abstract])) OR (Procedures, Laryngoscopic Surgical[Title/Abstract])) OR (Surgical Procedure, Laryngoscopic[Title/Abstract])) OR (Surgery, Laryngoscopic[Title/Abstract])) OR (Surgical Procedures, Laryngoscopic[Title/Abstract])) OR (Laryngoscopic Surgery[Title/Abstract])) OR (Laryngoscopic Surgeries[Title/Abstract])) OR (Surgeries, Laryngoscopic[Title/Abstract]) | 1,587   |
| 3             | #1 OR #2                                                                                                                                                                                                                                                                                                                                                                                                                                                                                                                                                                      | 14,263  |
| 4             | Intubation[MeSH]                                                                                                                                                                                                                                                                                                                                                                                                                                                                                                                                                              | 56,329  |
| 5             | Intubations[Title/Abstract]                                                                                                                                                                                                                                                                                                                                                                                                                                                                                                                                                   | 2,801   |
| 6             | #4 OR #5                                                                                                                                                                                                                                                                                                                                                                                                                                                                                                                                                                      | 57,268  |
| 7             | endotracheal intubation[MeSH]                                                                                                                                                                                                                                                                                                                                                                                                                                                                                                                                                 | 41,406  |
| 8             | ((((((Intratracheal Intubation[Title/Abstract]) OR (Intratracheal Intubations[Title/Abstract])) OR (Intubations, Intratracheal[Title/Abstract])) OR (Intubation, Endotracheal[Title/Abstract])) OR (Endotracheal Intubation[Title/Abstract])) OR (Endotracheal Intubations[Title/Abstract])) OR (Intubations, Endotracheal[Title/Abstract])                                                                                                                                                                                                                                   | 19,057  |
| 9             | #7 OR #8                                                                                                                                                                                                                                                                                                                                                                                                                                                                                                                                                                      | 48,337  |
| 10            | airway management[MeSH]                                                                                                                                                                                                                                                                                                                                                                                                                                                                                                                                                       | 126,797 |
| 11            | ((Management, Airway[Title/Abstract]) OR (Airway Control[Title/Abstract])) OR (Control, Airway[Title/Abstract])                                                                                                                                                                                                                                                                                                                                                                                                                                                               | 840     |
| 12            | #10 OR #11                                                                                                                                                                                                                                                                                                                                                                                                                                                                                                                                                                    | 127,272 |
| 13            | #3 OR #6 OR #9 OR #12                                                                                                                                                                                                                                                                                                                                                                                                                                                                                                                                                         | 156,747 |
| 14            | Thyromental Height[MeSH]                                                                                                                                                                                                                                                                                                                                                                                                                                                                                                                                                      | 8       |
| 15            | (((Thyromental Height[Title/Abstract]) OR (Thyromental Height Test[Title/Abstract])) OR (TMH[Title/Abstract])) OR (TMHT[Title/Abstract])                                                                                                                                                                                                                                                                                                                                                                                                                                      | 788     |
| 16            | #14 OR #15                                                                                                                                                                                                                                                                                                                                                                                                                                                                                                                                                                    | 796     |
| 17            | #13 AND #16                                                                                                                                                                                                                                                                                                                                                                                                                                                                                                                                                                   | 23      |
